# Supplementary material for: Management of thyroid eye disease: a Consensus Statement by the American Thyroid Association and the European Thyroid Association
Source: PubMed Central journal article supplement (PMC9727317; doi:10.1530/etj-22-0189), 2022-12-08
Supplement: supplementary_figure_2.pdf [file supplementary_figure_2.pdf]

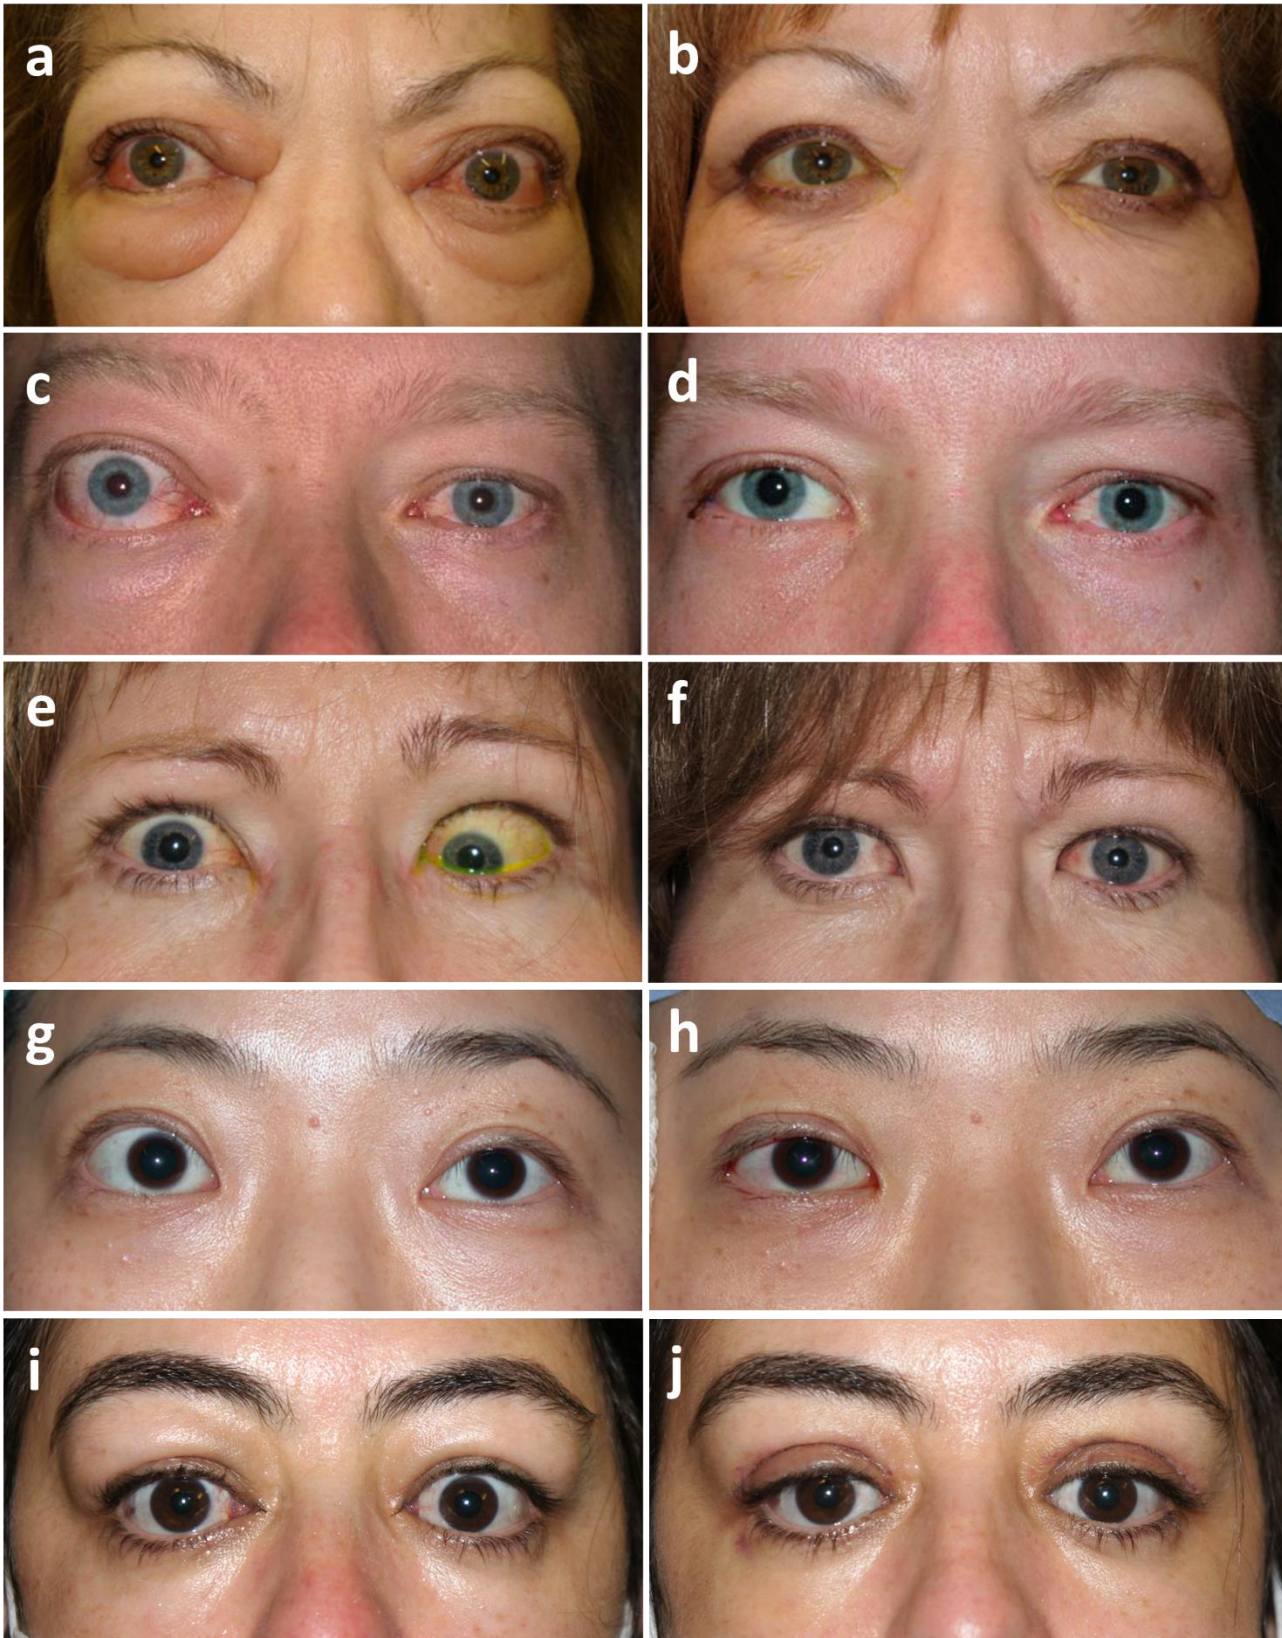

**Supplementary Figure 2: Surgical outcomes in TED (Courtesy P Dolman)**

**a, b.** Congestive orbitopathy: **a:** This patient had persistent periorbital inflammatory signs with congestion and edema that was non-responsive to IVGC. She had no progression in any of her severity parameters for over 6 months. Although her CAS scores were very high, she had inactive disease (false positive CAS). **b.** 2 Weeks

following orbital decompression, her soft tissue inflammatory signs had markedly improved (CAS reduced to zero) from reduction in venous congestion rather than disease inactivation.

**c:** Right asymmetric proptosis from fat expansion with lid retraction.

**d.** Improved symmetry following right orbital decompression for disfiguring proptosis along with upper eyelid lowering and lower eyelid elevation.

**e, f:** Quiescent orbitopathy with misaligned eyes, strabismus, and retracted eyelids, before and after ocular alignment and upper eyelid lowering surgery.

**g, h:** Isolated right upper eyelid retraction before and after levator recession surgery from a posterior approach

**i, j:** Bilateral upper lid retraction and upper lid and sub-brow fat expansion before and after upper lid lowering from an anterior approach along with fat sculpting blepharoplasty.

**Abbreviations:** CAS: clinical activity score; IVGC: intravenous glucocorticoids; TED: thyroid eye disease
