# Supplementary material for: Management of thyroid eye disease: a Consensus Statement by the American Thyroid Association and the European Thyroid Association
Source: PubMed Central journal article supplement (PMC9727317; doi:10.1530/etj-22-0189), 2022-12-08
Supplement: supplementary_table_1.pdf [file supplementary_table_1.pdf]

**Supplementary Table 1: Conflict of Interest Disclosures ATA-ETA Thyroid Eye Disease Consensus Statement**

| First Name | Last Name  | Financial Disclosure Form? | FDF Date Received? | Disclosures Noted                                                                           | Is this relationship relevant?    | Mitigation Measures                                                                             |
|------------|------------|----------------------------|--------------------|---------------------------------------------------------------------------------------------|-----------------------------------|-------------------------------------------------------------------------------------------------|
| Henry      | Burch      | Yes                        | 12/08/2020         | UpToDate                                                                                    | No                                |                                                                                                 |
| Petros     | Perros     | Yes                        | 11/03/2020         | IBSA<br>Institut<br>Biochimie                                                               | No                                |                                                                                                 |
| Tomasz     | Bednarczuk | Yes                        | 11/04/2020         | Merck<br><br>Berlin-<br>Chemie<br><br>Novartis<br><br>Ipsen<br><br>Roche<br>diagnostics     | No<br><br>No<br><br>No<br><br>No  |                                                                                                 |
| David      | Cooper     | Yes                        | 3/31/2020          | None                                                                                        |                                   |                                                                                                 |
| Peter      | Dolman     | Yes                        | 12/16/2020         | Immunovant                                                                                  | No                                |                                                                                                 |
| Angela     | Leung      | Yes                        | 05/10/2021         | Vertice<br><br>Medscape<br><br>China Merck<br><br>IBSA<br>Institut<br>Biochimie             | No<br><br>No<br><br>No<br><br>No  |                                                                                                 |
| Ilse       | Mombaerts. | Yes                        | 11/05/2020         | None                                                                                        |                                   |                                                                                                 |
| Mario      | Salvi      | Yes                        | 11/29/2020         | IBSA<br>Institut<br>Biochimie<br><br>Valenza-Bio<br><br>Roche -<br>Institutional<br>Funding | No<br><br>No<br><br>No<br><br>Yes | Recusal from discussion of teprotumumab, institutional support was considered non-exclusionary. |

|        |      |     |            |                                                                                                          |                                   |                                                                                                                       |
|--------|------|-----|------------|----------------------------------------------------------------------------------------------------------|-----------------------------------|-----------------------------------------------------------------------------------------------------------------------|
|        |      |     |            | only<br>Horizon-<br>institutional<br>support only                                                        |                                   |                                                                                                                       |
| Marius | Stan | Yes | 10/16/2020 | Horizon-<br>institutional<br>support only<br><br>Immunovant<br><br>Siemens<br>Healthineers<br><br>Tolmar | Yes<br><br>No<br><br>No<br><br>No | Recusal from<br>discussion of<br>teprotumumab;<br>institutional<br>support was<br>considered<br>non-<br>exclusionary. |
